# Supplementary material for: Metabolomic analysis of bioactive compounds in dill (Anethum graveolens L.) extracts
Source: PeerJ. 2025 Jun 10;13:e19567. doi: 10.7717/peerj.19567 (PMC12164813; doi:10.7717/peerj.19567)
Supplement: Supplemental Information 5 [file peerj-13-19567-s005.xlsx]

## Sheet: Sheet1
	Raw data of 1H NMR metabolomics data, related to Table 1, Figure 1, 2, 3, 5, and 1S
Run order	Well position	Sample code	Class	0.70269	0.70302	0.70336	0.70369	0.70403	0.70437	0.7047	0.70504	0.70538	0.70571	0.70605	0.70639	0.70672	0.70706	0.7074	0.70773	0.70807	0.7084	0.70874	0.70908	0.70941	0.70975	0.71009	0.71042	0.71076	0.7111	0.71143	0.71177	0.71211	0.71244	0.71278	0.71311	0.71345	0.71379	0.71412	0.71446	0.7148	0.71513	0.71547	0.71581	0.71614	0.71648	0.71682	0.71715	0.71749	0.71782
1	1	27 °C, 2 min (1)	1	0.0053	0.00508	0.00487	0.00468	0.00504	0.0049	0.00414	0.00398	0.00473	0.00499	0.00541	0.00584	0.00559	0.00487	0.00447	0.00449	0.00441	0.0051	0.00564	0.00616	0.00729	0.00801	0.00732	0.00619	0.00578	0.00577	0.00588	0.00536	0.00543	0.00596	0.00638	0.00658	0.00653	0.00558	0.00496	0.00559	0.00597	0.00539	0.00565	0.00657	0.00694	0.00673	0.00684	0.00657	0.00566	0.00568
39	15	27 °C, 2 min (5)	1	0.00742	0.00634	0.00496	0.0048	0.00517	0.00592	0.00668	0.00688	0.00647	0.00569	0.00493	0.00494	0.00494	0.00494	0.00494	0.00494	0.00494	0.00494	0.00567	0.00602	0.00609	0.0064	0.00647	0.00671	0.00778	0.00828	0.00745	0.00676	0.00685	0.00786	0.00852	0.00858	0.00813	0.00722	0.00567	0.00582	0.00605	0.00624	0.00624	0.00699	0.00827	0.00832	0.00788	0.00765	0.00727	0.00686
30	6	27 °C, 2 min (4)	1	0.00519	0.00534	0.00572	0.00588	0.00618	0.00623	0.00569	0.0059	0.00564	0.00529	0.00577	0.00593	0.00606	0.00609	0.006	0.0064	0.00696	0.00762	0.00734	0.0065	0.00632	0.0058	0.00574	0.00634	0.00633	0.00597	0.00606	0.00619	0.00658	0.00617	0.00597	0.00635	0.00646	0.00663	0.00653	0.00732	0.00715	0.00707	0.0072	0.00667	0.00609	0.00591	0.00569	0.00564	0.00643	0.00712
19	19	27 °C, 2 min (3)	1	0.00672	0.00696	0.00786	0.00838	0.0079	0.00818	0.00859	0.0084	0.00799	0.00765	0.00718	0.00705	0.00705	0.00734	0.00716	0.00652	0.0061	0.00615	0.0064	0.00592	0.00599	0.00625	0.00624	0.00527	0.00474	0.00488	0.00488	0.00638	0.0071	0.00626	0.00593	0.00591	0.0054	0.00567	0.00614	0.00652	0.00737	0.00749	0.0065	0.00666	0.00652	0.00672	0.00697	0.00755	0.0084	0.00877
10	10	27 °C, 2 min (2)	1	0.00386	0.0036	0.00465	0.00558	0.00522	0.00442	0.00428	0.00451	0.00402	0.00402	0.00479	0.00508	0.0047	0.00521	0.00558	0.00587	0.00597	0.00642	0.00657	0.00704	0.00672	0.00633	0.0066	0.00672	0.00696	0.00703	0.00629	0.0056	0.00598	0.00595	0.00553	0.00535	0.005	0.00576	0.00666	0.00653	0.00627	0.00621	0.00717	0.00782	0.00751	0.00737	0.00701	0.00643	0.0066	0.0066
45	21	27 °C, 1 h (3)	2	0.0039	0.00456	0.00539	0.00582	0.00496	0.00437	0.00414	0.00394	0.00446	0.00508	0.00565	0.00578	0.00545	0.00543	0.00542	0.00507	0.00523	0.0058	0.00586	0.00573	0.00557	0.00569	0.0054	0.00489	0.00457	0.00506	0.00598	0.00656	0.00673	0.00666	0.00646	0.00613	0.0061	0.0066	0.00698	0.0076	0.00803	0.00744	0.00673	0.0067	0.00665	0.00687	0.00669	0.0063	0.00643	0.00685
35	11	27 °C, 1 h (4)	2	0.00454	0.00426	0.00425	0.00477	0.00443	0.00417	0.00391	0.00454	0.00484	0.00441	0.00465	0.00467	0.00414	0.0036	0.00363	0.00432	0.00463	0.0046	0.00429	0.00451	0.00472	0.00466	0.00419	0.00436	0.00455	0.00434	0.00505	0.00546	0.00502	0.00452	0.00494	0.00541	0.00559	0.00583	0.00602	0.00541	0.005	0.00511	0.00517	0.00488	0.00532	0.00622	0.00668	0.00651	0.00614	0.00629
20	20	27 °C, 1 h (5)	2	0.00537	0.00497	0.0047	0.0048	0.00419	0.00353	0.004	0.00489	0.00491	0.00491	0.00522	0.00528	0.00507	0.00541	0.0053	0.00449	0.00495	0.00475	0.00449	0.00473	0.00572	0.00637	0.00674	0.00663	0.00625	0.00633	0.00671	0.00649	0.00594	0.00581	0.00577	0.00586	0.00628	0.00566	0.00521	0.00545	0.00602	0.00683	0.00659	0.00607	0.00543	0.00547	0.00575	0.00574	0.00604	0.00604
47	23	27 °C, 1 h (2)	2	0.00645	0.00623	0.00606	0.00554	0.00523	0.00522	0.00478	0.00512	0.00491	0.0053	0.005	0.00541	0.00602	0.00578	0.00562	0.00645	0.00615	0.00611	0.00674	0.0069	0.0068	0.00665	0.00633	0.00622	0.00565	0.00509	0.00504	0.00553	0.00635	0.00655	0.00694	0.00727	0.00734	0.00711	0.00714	0.00739	0.00718	0.00712	0.00641	0.00584	0.00587	0.00581	0.00598	0.00598	0.00657	0.0069
2	2	27 °C, 1 h (1)	2	0.00441	0.00431	0.00474	0.00479	0.00521	0.00638	0.00639	0.00593	0.00559	0.00492	0.00461	0.00443	0.00536	0.00582	0.00575	0.00533	0.00528	0.00622	0.0067	0.00671	0.00665	0.00538	0.00496	0.00514	0.00473	0.00497	0.00497	0.00497	0.00497	0.00497	0.00497	0.00497	0.00497	0.00497	0.00497	0.00497	0.00517	0.00556	0.00563	0.00601	0.00687	0.0063	0.00626	0.00699	0.00748	0.00813
42	18	27 °C, 2 h (5)	3	0.00513	0.00488	0.00513	0.00526	0.00542	0.00524	0.00477	0.00418	0.00423	0.00451	0.00444	0.0043	0.00456	0.00444	0.00438	0.00452	0.00462	0.00461	0.00447	0.00441	0.00448	0.00525	0.0059	0.00613	0.00624	0.00628	0.00613	0.00634	0.00568	0.00476	0.0049	0.00522	0.00544	0.00505	0.00511	0.00563	0.00628	0.0063	0.0067	0.00718	0.00713	0.00705	0.00683	0.00638	0.0073	0.00808
3	3	27 °C, 2 h (1)	3	0.00478	0.00499	0.00475	0.00448	0.00511	0.0054	0.00587	0.00619	0.00628	0.00625	0.00594	0.00597	0.00692	0.00774	0.00738	0.00718	0.00736	0.00699	0.00652	0.00623	0.0059	0.00583	0.00604	0.00565	0.00547	0.00518	0.00469	0.0046	0.00493	0.00614	0.00675	0.00657	0.00662	0.00661	0.00695	0.00668	0.00614	0.00608	0.00572	0.0063	0.0061	0.00585	0.00645	0.00666	0.00657	0.0069
13	13	27 °C, 2 h (2)	3	0.00527	0.00517	0.00443	0.00401	0.00441	0.0057	0.00576	0.00549	0.00525	0.0053	0.00531	0.00567	0.00622	0.00624	0.00534	0.00483	0.00486	0.00527	0.00564	0.00582	0.00629	0.00653	0.00634	0.00597	0.00575	0.00627	0.00648	0.00607	0.0062	0.00644	0.00668	0.00669	0.00635	0.00579	0.00567	0.00618	0.0063	0.00655	0.00693	0.00709	0.0072	0.00667	0.00588	0.00564	0.00568	0.00581
28	4	27 °C, 2 h (3)	3	0.00473	0.00495	0.00457	0.00507	0.00515	0.00531	0.00535	0.00487	0.00438	0.00452	0.00477	0.00429	0.00416	0.00501	0.00508	0.00567	0.00661	0.00705	0.00637	0.00614	0.00602	0.00525	0.00512	0.00523	0.00501	0.00509	0.00493	0.00508	0.00544	0.0054	0.00604	0.00642	0.00653	0.00674	0.00643	0.0064	0.00651	0.00654	0.0065	0.00658	0.0064	0.00579	0.00571	0.00607	0.00564	0.00549
38	14	27 °C, 2 h (4)	3	0.00399	0.00412	0.00468	0.0052	0.0055	0.00549	0.00478	0.00408	0.00365	0.0032	0.00354	0.00372	0.00407	0.00412	0.00442	0.00467	0.00441	0.00495	0.00477	0.0044	0.00476	0.00477	0.00489	0.00463	0.00412	0.00375	0.00395	0.00423	0.00506	0.0053	0.00537	0.00623	0.00675	0.00634	0.00528	0.00513	0.00463	0.00505	0.00543	0.00553	0.00577	0.00591	0.00597	0.00579	0.00567	0.00604
36	12	90 °C, 2 min (5)	4	0.00372	0.00365	0.00299	0.00249	0.00292	0.00369	0.00364	0.00334	0.00336	0.00344	0.00386	0.00401	0.00401	0.00429	0.00455	0.00423	0.00371	0.00349	0.00288	0.00288	0.00323	0.00313	0.00318	0.00352	0.00383	0.00386	0.00382	0.00359	0.00423	0.00429	0.00461	0.00491	0.0046	0.00442	0.00428	0.00453	0.00469	0.00475	0.00452	0.00435	0.0043	0.00443	0.00406	0.0039	0.00454	0.00475
26	2	90 °C, 2 min (4)	4	0.00519	0.00505	0.0054	0.00588	0.00587	0.00511	0.00444	0.004	0.00365	0.00327	0.00359	0.00377	0.00468	0.00508	0.00559	0.0062	0.00635	0.00628	0.00598	0.00565	0.00632	0.00656	0.00597	0.00575	0.00513	0.00538	0.00658	0.00679	0.00673	0.00707	0.0075	0.00715	0.00724	0.00722	0.00755	0.00785	0.00836	0.00764	0.00667	0.00677	0.00715	0.00743	0.00757	0.00698	0.00622	0.00593
6	6	90 °C, 2 min (1)	4	0.00488	0.00563	0.006	0.00658	0.00641	0.00611	0.00591	0.00624	0.0057	0.00521	0.0057	0.00624	0.00601	0.00501	0.00512	0.00545	0.0056	0.00551	0.00526	0.00533	0.00516	0.0047	0.00497	0.0055	0.00588	0.00586	0.00604	0.00625	0.00634	0.0064	0.0064	0.00619	0.00578	0.0059	0.00611	0.0062	0.00581	0.00507	0.00538	0.00614	0.00747	0.00802	0.00834	0.00739	0.00667	0.0068
14	14	90 °C, 2 min (2)	4	0.00489	0.00522	0.00528	0.00423	0.00354	0.00348	0.00351	0.00326	0.00294	0.00376	0.00465	0.00454	0.00479	0.00455	0.00467	0.00514	0.00545	0.00558	0.0056	0.00543	0.00507	0.00484	0.00449	0.00456	0.00438	0.004	0.00493	0.00604	0.00675	0.00651	0.00574	0.00559	0.00583	0.00618	0.00635	0.00655	0.00599	0.00546	0.00602	0.00664	0.00682	0.00614	0.00589	0.00634	0.00662	0.00687
23	23	90 °C, 2 min (3)	4	0.00439	0.00438	0.00481	0.00486	0.00427	0.00431	0.00494	0.00533	0.00548	0.00593	0.00602	0.00541	0.00467	0.00403	0.00363	0.00364	0.00348	0.00359	0.00426	0.00431	0.004	0.00339	0.00386	0.00352	0.00391	0.00391	0.00463	0.00465	0.00496	0.00551	0.00627	0.00606	0.00511	0.00457	0.00475	0.005	0.00508	0.00515	0.0058	0.00662	0.00756	0.00796	0.00695	0.00686	0.0075	0.00728
11	11	90 °C, 1 h (1)	5	0.00424	0.00471	0.00503	0.00471	0.00549	0.00684	0.00763	0.00686	0.00601	0.00533	0.00411	0.00378	0.0043	0.00477	0.00487	0.00463	0.004	0.0036	0.00405	0.0045	0.00544	0.00608	0.00573	0.00486	0.00446	0.00453	0.00522	0.006	0.00619	0.00563	0.00542	0.00512	0.00507	0.00555	0.00625	0.00649	0.00692	0.0067	0.00658	0.00608	0.00542	0.00556	0.00604	0.00627	0.00691	0.00706
27	3	90 °C, 1 h (3)	5	0.0039	0.00352	0.00361	0.00389	0.00408	0.00437	0.00513	0.00567	0.00461	0.0034	0.00362	0.00369	0.00319	0.00366	0.00383	0.00339	0.00369	0.00361	0.00402	0.00447	0.00451	0.00475	0.00466	0.00492	0.00567	0.00583	0.0051	0.0053	0.00642	0.00634	0.00621	0.00644	0.00692	0.00681	0.00595	0.00546	0.00574	0.00591	0.00554	0.00577	0.00662	0.00657	0.00603	0.00539	0.00503	0.00473
22	22	90 °C, 1 h (2)	5	0.0029	0.00336	0.00333	0.00369	0.00374	0.00397	0.00445	0.00458	0.00404	0.004	0.00412	0.00368	0.0036	0.00348	0.00324	0.00376	0.00399	0.00373	0.00412	0.00429	0.00473	0.00502	0.00466	0.00393	0.00361	0.00403	0.00407	0.00457	0.00522	0.00501	0.00442	0.00378	0.00443	0.00495	0.00408	0.00465	0.00534	0.00608	0.00707	0.00731	0.00746	0.00695	0.00604	0.0057	0.00558	0.00553
41	17	90 °C, 1 h (5)	5	0.00321	0.00294	0.00253	0.00257	0.00315	0.00403	0.00424	0.00422	0.0038	0.00348	0.00391	0.00416	0.00335	0.00386	0.00382	0.00392	0.00412	0.00401	0.00322	0.00322	0.00346	0.00352	0.00357	0.00447	0.00456	0.0044	0.00455	0.00479	0.00544	0.00582	0.00557	0.00534	0.00486	0.00432	0.00418	0.00522	0.00601	0.00576	0.00522	0.0047	0.00483	0.00538	0.00554	0.005	0.00508	0.00567
37	13	90 °C, 1 h (4)	5	0.0031	0.00239	0.00197	0.00212	0.00256	0.00263	0.00307	0.00378	0.00368	0.00311	0.00284	0.00291	0.00301	0.00379	0.00376	0.00338	0.00282	0.00284	0.00398	0.00435	0.00408	0.00432	0.00395	0.00345	0.00312	0.00309	0.00315	0.00288	0.00282	0.00282	0.0029	0.00314	0.00342	0.0035	0.00316	0.00314	0.00362	0.00422	0.00449	0.00424	0.00407	0.0045	0.00507	0.00492	0.00387	0.00377
44	20	90 °C, 2 h (5)	6	0.00512	0.00574	0.0061	0.00534	0.00475	0.00486	0.00522	0.00507	0.00519	0.00501	0.00496	0.0055	0.00557	0.00541	0.0048	0.00433	0.00443	0.00481	0.00487	0.00578	0.00665	0.00657	0.00626	0.00554	0.00477	0.00518	0.00574	0.00569	0.00606	0.0061	0.00617	0.0061	0.00594	0.00538	0.00519	0.00598	0.00657	0.00657	0.00683	0.00689	0.00667	0.0067	0.0066	0.00652	0.00602	0.00647
29	5	90 °C, 2 h (3)	6	0.00448	0.00504	0.00487	0.00468	0.0052	0.00567	0.00558	0.00574	0.00615	0.00643	0.0064	0.00595	0.00537	0.00466	0.00439	0.00435	0.00441	0.00441	0.00441	0.00462	0.00446	0.00451	0.00524	0.00604	0.00678	0.00626	0.0054	0.00538	0.00526	0.00494	0.00548	0.00614	0.00614	0.00563	0.00573	0.00626	0.00682	0.0074	0.00678	0.00678	0.00677	0.00646	0.00653	0.00738	0.00844	0.00852
7	7	90 °C, 2 h (1)	6	0.00505	0.00512	0.00526	0.00586	0.00592	0.00531	0.00499	0.00461	0.00499	0.00576	0.00658	0.00659	0.00566	0.00501	0.00462	0.00477	0.0049	0.00465	0.00485	0.00538	0.00585	0.00644	0.00689	0.00706	0.0068	0.00688	0.00725	0.00724	0.00631	0.00598	0.00626	0.00632	0.00657	0.0058	0.00559	0.00678	0.00713	0.00676	0.00698	0.0067	0.00563	0.00554	0.00604	0.00677	0.00764	0.00818
17	17	90 °C, 2 h (2)	6	0.00457	0.00452	0.00476	0.00488	0.00464	0.0041	0.00395	0.00439	0.00515	0.00507	0.00482	0.0046	0.00425	0.00445	0.00466	0.00536	0.00509	0.00504	0.00531	0.00526	0.00495	0.00497	0.00531	0.00499	0.00512	0.00578	0.00649	0.00598	0.0051	0.00508	0.00495	0.00544	0.00603	0.0067	0.00698	0.00675	0.00614	0.00551	0.00549	0.00541	0.00517	0.0056	0.00625	0.00646	0.00646	0.0068
34	10	90 °C, 2 h (4)	6	0.00416	0.00384	0.00377	0.00377	0.00411	0.00409	0.00399	0.00375	0.00393	0.00414	0.0044	0.0041	0.00413	0.00441	0.00484	0.00553	0.00568	0.0049	0.00359	0.00237	0.00259	0.00355	0.00414	0.00451	0.00486	0.00522	0.00601	0.00596	0.00476	0.00412	0.00348	0.00318	0.00332	0.00423	0.00433	0.00424	0.00464	0.00466	0.00468	0.00472	0.00487	0.00489	0.00494	0.00543	0.00571	0.00515
32	8	Quality control (4)	7	0.00592	0.0057	0.00587	0.00552	0.00538	0.00547	0.0057	0.00542	0.00554	0.00586	0.00611	0.00606	0.00585	0.0055	0.00546	0.00555	0.00586	0.00632	0.00642	0.00561	0.00521	0.00512	0.00444	0.0048	0.00544	0.00538	0.00517	0.00533	0.00551	0.0053	0.00478	0.00461	0.00524	0.00541	0.0061	0.00696	0.00778	0.00827	0.00804	0.00782	0.00765	0.00752	0.00707	0.00628	0.00586	0.0065
40	16	Quality control (5)	7	0.00479	0.00482	0.0052	0.00581	0.0061	0.00596	0.00604	0.00543	0.00526	0.00559	0.0065	0.00736	0.0072	0.00676	0.00643	0.00603	0.00614	0.00652	0.00654	0.0065	0.00648	0.00704	0.00746	0.0072	0.00646	0.00597	0.00668	0.00703	0.00741	0.00728	0.0075	0.00801	0.00792	0.00817	0.00822	0.00819	0.00801	0.00794	0.00775	0.00789	0.00725	0.00661	0.00681	0.00716	0.00725	0.00763
8	8	Quality control (1)	7	0.00459	0.0046	0.00543	0.00658	0.00614	0.00529	0.00475	0.00448	0.0047	0.00496	0.00498	0.00471	0.00504	0.00578	0.00675	0.00709	0.00677	0.00657	0.00634	0.00675	0.00646	0.00534	0.0049	0.00506	0.00549	0.00653	0.00708	0.00742	0.0073	0.00663	0.00627	0.00606	0.00588	0.00629	0.00663	0.00701	0.00706	0.00702	0.00707	0.00745	0.00754	0.00749	0.00779	0.00782	0.00774	0.00765
46	22	Quality control (6)	7	0.00246	0.00238	0.00301	0.00372	0.00381	0.00406	0.00472	0.00416	0.00385	0.00361	0.00284	0.00239	0.00247	0.00244	0.00257	0.00284	0.00309	0.00337	0.00326	0.00287	0.00264	0.00262	0.00283	0.00316	0.00352	0.00338	0.00373	0.00435	0.00425	0.00417	0.00421	0.00401	0.0041	0.00412	0.00414	0.00349	0.00359	0.00438	0.00434	0.00451	0.00476	0.00522	0.00496	0.00478	0.00523	0.00546
16	16	Quality control (2)	7	0.00566	0.00607	0.00608	0.00567	0.00634	0.00682	0.00599	0.00555	0.00572	0.0057	0.0064	0.0066	0.00581	0.00571	0.00584	0.00603	0.00651	0.00683	0.00688	0.00724	0.00729	0.00719	0.00735	0.00693	0.00667	0.00643	0.00604	0.00659	0.00666	0.00662	0.00693	0.00749	0.00745	0.00745	0.00731	0.00744	0.00798	0.00793	0.0078	0.0073	0.00765	0.00797	0.00783	0.00772	0.00705	0.00682
24	24	Quality control (3)	7	0.0039	0.00383	0.00411	0.00409	0.00413	0.00438	0.00515	0.00533	0.00511	0.00462	0.00432	0.00342	0.00315	0.00388	0.00483	0.00484	0.00485	0.00479	0.00472	0.00455	0.00445	0.0044	0.00458	0.00434	0.00422	0.00403	0.00411	0.0048	0.00469	0.00459	0.00489	0.00405	0.00404	0.00476	0.00484	0.00464	0.0047	0.00407	0.00334	0.00335	0.00388	0.00466	0.00481	0.00516	0.00534	0.00562
[truncated: 5,000 more columns]
