# Supplementary material for: Metabolomic analysis of bioactive compounds in dill (Anethum graveolens L.) extracts
Source: PeerJ. 2025 Jun 10;13:e19567. doi: 10.7717/peerj.19567 (PMC12164813; doi:10.7717/peerj.19567)
Supplement: Supplemental Information 6 [file peerj-13-19567-s006.xlsx]

## Sheet: Sheet1
	Raw data of percentage yield of dill leaf extracts, related to Table S1
		27 °C, 2 min	27 °C, 1 h	27 °C, 2 h	90°C, 2 min	90 °C, 1 h	90 °C, 2 h
	1	11.4371	12.8072	14.6669	13.8185	14.4193	15.2319
	2	14.0772	14.7875	13.2549	15.564	13.7897	13.8349
	3	13.4834	13.4088	14.6936	16.98	15.0778	14.1127
	4	15.4254	15.0169	15.9744	13.0452	13.253	13.1747
	5	13.1522	14.1895	14.7852	12.6928	14.0202	13.1553
	Average	13.5151	14.042	14.675	14.4201	14.112	13.9019
	SD	1.45052	0.929196	0.964066	1.80952	0.685077	0.852075
