# Supplementary material for: Metabolomic analysis of bioactive compounds in dill (Anethum graveolens L.) extracts
Source: PeerJ. 2025 Jun 10;13:e19567. doi: 10.7717/peerj.19567 (PMC12164813; doi:10.7717/peerj.19567)
Supplement: Supplemental Information 7 [file peerj-13-19567-s007.xlsx]

## Sheet: Sheet1
	Raw data of absolute concentration of dill-identified metabolites, related to Figure 3
Sample code	Class	TSP	Pantothenate	Leucine	Isoleucine	Valine	α-ketoisovalerate	β-hydroxybutyrate	(S)-3-hydroxybutyrate	Threonine	Lactate	Alanine	Acetate	α-hydroxyisovalerate	Isovalerate	α-ketoisocaproate	Homocysteine	Methionine	g-aminobutyrate	Succinate	Pyridoxamine	Citrate	Aspartate	Sarcosine	Acetylcholine	3,7-Dimethylurate	Proline	Sucrose	Malate	β-glucose	Cellobiose	α-glucose	Uracil	Fumarate	Tyrosine	Phenylalanine	Tryptophan	Pyridoxal	Indole-3-lactate	Adenine	Inosine	Formate	Folate
27 °C, 2 min (1)	1	6.34337e+09	1.5542e+10	1.61658e+10	4.15387e+10	3.79157e+10	2.6451e+09	3.74864e+09	2.62787e+10	6.72496e+09	3.23579e+10	1.06055e+11	5.52522e+10	2.42758e+10	2.93742e+10	2.62734e+10	1.49567e+10	1.25978e+10	5.92088e+10	3.03023e+11	4.826e+10	1.48342e+10	4.69153e+10	4.76374e+09	1.59632e+11	2.69172e+10	1.18936e+10	1.56841e+11	4.16072e+10	2.24375e+09	3.4628e+10	2.64097e+10	7.51398e+08	1.5583e+10	2.55189e+09	3.07029e+09	4.9385e+09	1.01552e+09	2.50198e+08	1.02973e+08	2.54562e+08	2.1636e+10	4.79314e+07
27 °C, 1 h (1)	2	6.25878e+09	1.69005e+10	1.78315e+10	4.40556e+10	4.10595e+10	2.65097e+09	2.75091e+09	2.8223e+10	6.74041e+09	3.57315e+10	1.13563e+11	5.84517e+10	2.66284e+10	3.19832e+10	2.87192e+10	1.58446e+10	1.39465e+10	6.43888e+10	3.17755e+11	6.09776e+10	2.08762e+10	5.77574e+10	5.45825e+09	1.95529e+11	2.88962e+10	1.24266e+10	1.48208e+11	5.2285e+10	3.03826e+09	4.50555e+10	3.51299e+10	8.92951e+08	1.6879e+10	3.05866e+09	3.21422e+09	5.12981e+09	1.10266e+09	4.13817e+08	1.26147e+08	3.82978e+08	2.19318e+10	3.17335e+07
27 °C, 2 h (1)	3	6.75342e+09	1.80294e+10	2.03117e+10	4.88478e+10	4.49271e+10	2.65258e+09	3.02142e+09	3.09474e+10	7.4672e+09	3.75641e+10	1.26316e+11	6.22737e+10	2.77453e+10	3.38449e+10	2.9938e+10	1.65771e+10	1.54787e+10	7.1003e+10	3.49654e+11	6.42742e+10	2.16197e+10	5.89334e+10	5.75136e+09	2.14322e+11	3.03077e+10	1.2901e+10	1.30712e+11	5.47153e+10	4.21166e+09	5.48928e+10	4.47376e+10	9.03327e+08	1.82472e+10	3.43434e+09	3.612e+09	5.73537e+09	1.10598e+09	3.50137e+08	1.36436e+08	3.98591e+08	2.3733e+10	6.23719e+07
90 °C, 2 min (1)	6	6.04552e+09	1.62162e+10	1.58328e+10	4.62761e+10	4.313e+10	2.56354e+09	2.78431e+09	3.05972e+10	6.97071e+09	3.72724e+10	1.19112e+11	5.80684e+10	2.43366e+10	3.032e+10	2.66708e+10	1.66162e+10	1.40129e+10	6.43673e+10	3.69391e+11	6.6241e+10	2.41752e+10	6.30008e+10	6.0068e+09	1.9475e+11	2.67919e+10	1.24464e+10	2.24165e+11	6.09114e+10	2.09766e+09	2.40709e+10	1.84857e+10	1.05983e+09	1.82907e+10	3.97173e+09	3.40062e+09	5.78178e+09	3.73721e+09	6.97494e+08	3.60573e+08	1.10505e+09	2.5896e+10	4.36137e+08
90 °C, 2 h (1)	8	6.57477e+09	1.60466e+10	1.65891e+10	4.63371e+10	4.36916e+10	2.77033e+09	3.0103e+09	2.98177e+10	6.98854e+09	3.63196e+10	1.22618e+11	5.82597e+10	2.473e+10	3.0619e+10	2.68408e+10	1.69164e+10	1.43391e+10	6.41183e+10	3.54997e+11	6.56653e+10	2.51919e+10	6.18597e+10	5.95303e+09	2.03178e+11	3.03491e+10	1.29496e+10	2.0642e+11	6.19203e+10	2.37113e+09	2.44283e+10	1.92178e+10	1.14788e+09	1.85752e+10	4.40514e+09	3.61404e+09	6.20865e+09	4.4052e+09	9.74862e+08	8.11504e+08	1.60134e+09	2.41004e+10	7.26943e+08
Quality control (1)	9	9.84932e+10	2.1333e+10	2.61704e+10	5.52991e+10	5.12821e+10	1.13553e+10	3.80609e+09	3.01252e+10	1.16773e+10	2.71633e+11	1.31668e+11	1.77082e+11	2.89734e+10	3.40874e+10	3.01013e+10	1.6453e+10	2.04152e+10	7.22341e+10	3.85789e+11	5.6763e+10	2.1362e+10	5.12801e+10	6.04598e+09	2.07525e+11	2.88438e+10	1.42232e+10	1.33632e+11	4.97427e+10	3.90751e+09	4.24628e+10	3.06882e+10	1.86403e+09	1.49434e+10	3.74577e+09	4.22351e+09	6.98137e+09	1.87736e+09	5.78069e+08	2.92963e+08	7.18205e+08	2.06115e+10	2.59352e+08
27 °C, 2 min (2)	1	6.24222e+09	1.5885e+10	1.61331e+10	4.30481e+10	4.01049e+10	2.58707e+09	3.43261e+09	2.77403e+10	6.62063e+09	3.51346e+10	1.07647e+11	5.84505e+10	2.47942e+10	2.99257e+10	2.67339e+10	1.53842e+10	1.29652e+10	6.02819e+10	3.10637e+11	5.4691e+10	1.74017e+10	5.05475e+10	4.93686e+09	1.74636e+11	2.86683e+10	1.23698e+10	1.58641e+11	4.5296e+10	2.34994e+09	3.81004e+10	2.54508e+10	8.23506e+08	1.67083e+10	2.87022e+09	3.33749e+09	5.31864e+09	1.34333e+09	2.85391e+08	1.7755e+08	2.73802e+08	2.19862e+10	7.43046e+07
90 °C, 1 h (1)	7	6.58097e+09	1.49322e+10	1.63015e+10	4.48911e+10	4.20326e+10	2.73012e+09	3.03387e+09	2.90661e+10	6.7575e+09	3.46816e+10	1.19506e+11	5.6344e+10	2.42735e+10	3.01868e+10	2.6432e+10	1.66482e+10	1.41266e+10	6.31326e+10	3.47307e+11	6.75087e+10	2.55399e+10	6.05039e+10	5.90935e+09	1.95359e+11	2.8635e+10	1.23705e+10	2.00036e+11	6.0794e+10	2.23498e+09	2.49674e+10	1.83331e+10	1.08034e+09	1.81702e+10	4.26067e+09	3.57973e+09	6.12245e+09	4.19949e+09	1.07471e+09	8.11345e+08	1.55693e+09	2.29256e+10	7.40094e+08
27 °C, 2 h (2)	3	6.77925e+09	1.77842e+10	2.0433e+10	4.66371e+10	4.32588e+10	2.69528e+09	2.95986e+09	2.95426e+10	7.132e+09	3.76676e+10	1.1659e+11	5.99011e+10	2.78749e+10	3.39844e+10	3.03257e+10	1.61458e+10	1.52977e+10	6.91904e+10	3.31673e+11	6.19911e+10	2.15696e+10	5.80212e+10	5.61508e+09	2.11992e+11	3.2804e+10	1.28042e+10	1.26498e+11	5.38279e+10	4.00537e+09	6.63355e+10	4.51501e+10	9.11882e+08	1.78751e+10	3.36939e+09	3.43571e+09	5.59302e+09	1.05364e+09	4.399e+08	1.66753e+08	4.36714e+08	2.28634e+10	1.20393e+08
90 °C, 2 min (2)	6	6.45112e+09	1.50089e+10	1.55565e+10	4.52814e+10	4.21218e+10	2.61178e+09	2.58703e+09	2.96995e+10	7.08514e+09	3.68731e+10	1.1619e+11	5.82669e+10	2.45429e+10	3.05164e+10	2.65788e+10	1.67402e+10	1.40827e+10	6.42354e+10	3.53737e+11	6.92088e+10	2.53634e+10	6.38396e+10	6.10833e+09	1.93122e+11	2.96827e+10	1.25101e+10	2.19291e+11	6.05408e+10	2.03805e+09	2.27875e+10	1.80739e+10	1.05062e+09	1.80666e+10	4.05614e+09	3.372e+09	5.7841e+09	3.65811e+09	6.87408e+08	4.60176e+08	1.30724e+09	2.44686e+10	5.34188e+08
Quality control (2)	9	1.03723e+11	2.12101e+10	2.6142e+10	5.49241e+10	5.1027e+10	1.13517e+10	3.79664e+09	2.99525e+10	1.17772e+10	2.76106e+11	1.30117e+11	1.79013e+11	2.89413e+10	3.41638e+10	3.02567e+10	1.63245e+10	2.03862e+10	7.16399e+10	3.84177e+11	5.63315e+10	2.11204e+10	5.163e+10	6.02257e+09	2.06059e+11	2.96784e+10	1.43053e+10	1.35115e+11	4.97204e+10	3.90383e+09	4.08234e+10	3.0711e+10	1.84919e+09	1.50618e+10	3.7644e+09	4.14469e+09	6.95384e+09	1.82008e+09	5.13588e+08	3.04136e+08	6.99547e+08	2.08344e+10	2.54434e+08
90 °C, 2 h (2)	8	6.04757e+09	1.62278e+10	1.56163e+10	4.59178e+10	4.3488e+10	2.66477e+09	2.89053e+09	2.9527e+10	7.16399e+09	3.50132e+10	1.2639e+11	7.46587e+10	2.41709e+10	3.00021e+10	2.6603e+10	1.64526e+10	1.39475e+10	6.42072e+10	3.62727e+11	6.75576e+10	2.56128e+10	6.2577e+10	5.70369e+09	1.97511e+11	2.59717e+10	1.31676e+10	2.05583e+11	6.26115e+10	2.21642e+09	2.02564e+10	1.82299e+10	1.19731e+09	1.8715e+10	4.19188e+09	3.51881e+09	6.06824e+09	4.03868e+09	6.84202e+08	8.35619e+08	1.80125e+09	2.29025e+10	9.87186e+08
27 °C, 2 min (3)	1	6.17226e+09	1.61638e+10	1.64035e+10	4.45864e+10	4.06181e+10	2.62586e+09	3.65689e+09	2.89243e+10	6.76605e+09	3.41062e+10	1.17125e+11	5.54349e+10	2.50728e+10	3.07201e+10	2.72902e+10	1.54601e+10	1.29982e+10	6.26925e+10	3.37706e+11	5.2928e+10	1.64672e+10	4.98947e+10	4.9059e+09	1.74403e+11	2.76211e+10	1.24696e+10	1.69481e+11	4.39421e+10	2.3578e+09	3.29026e+10	2.65602e+10	7.9189e+08	2.02538e+10	2.80807e+09	3.32998e+09	5.26897e+09	1.16133e+09	2.24761e+08	1.407e+08	2.98827e+08	2.38334e+10	3.51417e+07
27 °C, 1 h (5)	2	6.29065e+09	1.74701e+10	1.84648e+10	4.38032e+10	4.10219e+10	2.59845e+09	2.8701e+09	2.80596e+10	6.75025e+09	3.57272e+10	1.11782e+11	5.53766e+10	2.67128e+10	3.27283e+10	2.9134e+10	1.58116e+10	1.43855e+10	6.51198e+10	3.07528e+11	5.98412e+10	1.9885e+10	5.46247e+10	5.52838e+09	2.02991e+11	3.01122e+10	1.25709e+10	1.2916e+11	5.0095e+10	3.1973e+09	5.41632e+10	3.50637e+10	9.40986e+08	1.63618e+10	3.34156e+09	3.47062e+09	5.61172e+09	1.21308e+09	4.52076e+08	1.29484e+08	4.1262e+08	2.15976e+10	4.68704e+07
90 °C, 1 h (2)	7	6.14471e+09	1.53527e+10	1.57776e+10	4.34977e+10	4.15521e+10	2.63622e+09	2.65103e+09	2.88319e+10	6.73315e+09	3.63224e+10	1.15329e+11	5.34149e+10	2.41689e+10	3.01618e+10	2.65069e+10	1.64755e+10	1.41428e+10	6.11941e+10	3.46714e+11	6.92134e+10	2.50932e+10	6.06057e+10	6.0054e+09	1.96021e+11	2.92591e+10	1.27821e+10	2.13901e+11	5.99067e+10	2.2552e+09	2.24839e+10	1.82423e+10	1.14283e+09	1.63863e+10	4.34126e+09	3.47943e+09	5.99633e+09	4.1953e+09	8.12367e+08	9.26263e+08	1.9473e+09	2.45088e+10	9.97839e+08
90 °C, 2 min (3)	6	6.56629e+09	1.43466e+10	1.54644e+10	4.53411e+10	4.28642e+10	2.56012e+09	2.61604e+09	2.93716e+10	7.03839e+09	3.70498e+10	1.20678e+11	4.93985e+10	2.46341e+10	3.07417e+10	2.66621e+10	1.68405e+10	1.41799e+10	6.29152e+10	3.54946e+11	7.07361e+10	2.57519e+10	6.38339e+10	6.17571e+09	1.9734e+11	3.10592e+10	1.26065e+10	2.15483e+11	6.12089e+10	2.15153e+09	2.14874e+10	1.82289e+10	1.10915e+09	1.84212e+10	4.07529e+09	3.50723e+09	5.89886e+09	3.55012e+09	6.87205e+08	4.94611e+08	1.32326e+09	2.25288e+10	5.91404e+08
Quality control (3)	9	1.1885e+11	2.0285e+10	2.55683e+10	5.03174e+10	4.71278e+10	1.06888e+10	3.72772e+09	2.75971e+10	1.14333e+10	2.60479e+11	1.15781e+11	1.47692e+11	2.88133e+10	3.38209e+10	2.98021e+10	1.59204e+10	1.90618e+10	6.86177e+10	3.2271e+11	5.3754e+10	2.11693e+10	4.90505e+10	5.99121e+09	2.02092e+11	3.14738e+10	1.39281e+10	1.31099e+11	4.71134e+10	3.71105e+09	3.99768e+10	2.93024e+10	1.81146e+09	1.26797e+10	3.70257e+09	4.1096e+09	6.82448e+09	1.73641e+09	5.60011e+08	2.93599e+08	6.65538e+08	1.73284e+10	2.07135e+08
90 °C, 2 min (4)	6	6.00528e+09	1.58042e+10	1.55368e+10	4.71523e+10	4.41084e+10	2.56439e+09	2.57251e+09	3.0471e+10	6.83514e+09	3.87723e+10	1.20563e+11	6.64961e+10	2.47019e+10	3.0809e+10	2.71503e+10	1.68431e+10	1.42192e+10	6.57592e+10	3.73393e+11	7.03812e+10	2.56921e+10	6.453e+10	5.9832e+09	1.96344e+11	3.05097e+10	1.28889e+10	2.32158e+11	6.25756e+10	2.12616e+09	2.14806e+10	1.86335e+10	1.06375e+09	1.97664e+10	4.05717e+09	3.47184e+09	5.87659e+09	3.64954e+09	7.53896e+08	4.27327e+08	1.31366e+09	2.41983e+10	5.13853e+08
90 °C, 1 h (3)	7	6.22753e+09	1.52402e+10	1.57827e+10	4.4797e+10	4.21226e+10	2.66807e+09	2.65122e+09	2.88476e+10	6.55004e+09	3.4682e+10	1.19693e+11	5.29501e+10	2.43859e+10	3.03658e+10	2.65581e+10	1.64597e+10	1.40103e+10	6.40511e+10	3.27661e+11	6.95981e+10	2.60218e+10	6.29811e+10	6.0119e+09	2.0012e+11	2.91141e+10	1.2523e+10	1.98173e+11	6.13561e+10	2.22861e+09	2.48203e+10	1.81774e+10	1.15843e+09	1.60487e+10	4.30924e+09	3.47468e+09	6.06575e+09	4.27009e+09	8.03699e+08	9.1863e+08	1.96292e+09	2.15386e+10	1.01643e+09
27 °C, 2 h (3)	3	6.56628e+09	1.81117e+10	1.9961e+10	4.61448e+10	4.31858e+10	2.67805e+09	2.87337e+09	2.9246e+10	7.02523e+09	3.44852e+10	1.14033e+11	6.2514e+10	2.77807e+10	3.4003e+10	3.03566e+10	1.60885e+10	1.52365e+10	6.78014e+10	3.29144e+11	6.29384e+10	2.11414e+10	5.8248e+10	5.64376e+09	2.13383e+11	3.16981e+10	1.2745e+10	1.18874e+11	5.35834e+10	3.75178e+09	6.33565e+10	4.19768e+10	9.73737e+08	1.80175e+10	3.49384e+09	3.49508e+09	5.63645e+09	1.1479e+09	4.75797e+08	1.63744e+08	4.55029e+08	2.29634e+10	9.54912e+07
90 °C, 2 h (3)	8	6.62184e+09	1.60117e+10	1.65596e+10	4.76176e+10	4.48705e+10	2.76081e+09	2.78593e+09	3.06079e+10	7.03105e+09	3.66874e+10	1.27783e+11	6.16205e+10	2.5393e+10	3.12872e+10	2.75502e+10	1.7002e+10	1.45183e+10	6.58798e+10	3.72253e+11	7.07968e+10	2.65489e+10	6.67472e+10	6.05313e+09	2.08309e+11	3.02456e+10	1.3109e+10	2.02434e+11	6.47326e+10	2.34823e+09	2.47233e+10	1.9325e+10	1.11224e+09	1.53985e+10	4.48694e+09	3.82371e+09	6.43332e+09	4.45485e+09	7.88817e+08	8.93283e+08	1.9197e+09	2.505e+10	9.17915e+08
27 °C, 2 min (4)	1	6.33088e+09	1.66487e+10	1.68019e+10	4.56438e+10	4.19974e+10	2.72688e+09	2.70739e+09	2.92118e+10	6.74456e+09	3.3045e+10	1.13683e+11	6.06655e+10	2.58771e+10	3.1311e+10	2.77996e+10	1.58555e+10	1.32869e+10	6.42587e+10	3.35136e+11	5.23856e+10	1.76843e+10	5.13686e+10	5.06904e+09	1.79304e+11	3.25971e+10	1.31035e+10	1.58695e+11	4.5732e+10	2.46361e+09	3.62428e+10	2.81154e+10	8.36041e+08	1.9357e+10	2.86914e+09	3.41588e+09	5.44064e+09	1.24481e+09	3.01501e+08	8.97079e+07	3.23374e+08	2.15787e+10	3.02056e+07
Quality control (4)	9	1.00844e+11	2.13528e+10	2.62344e+10	5.56331e+10	5.13981e+10	1.12981e+10	3.81496e+09	3.0223e+10	1.15533e+10	2.7389e+11	1.32069e+11	1.8063e+11	2.92748e+10	3.46549e+10	3.06746e+10	1.6125e+10	2.04655e+10	7.18686e+10	3.91843e+11	5.66199e+10	2.16112e+10	5.15522e+10	6.05994e+09	2.06866e+11	2.92089e+10	1.43154e+10	1.31857e+11	4.91777e+10	3.97972e+09	4.27613e+10	3.13831e+10	1.85471e+09	1.51884e+10	3.78289e+09	4.2048e+09	7.02122e+09	1.70001e+09	5.32013e+08	3.42967e+08	6.79002e+08	2.1623e+10	1.91645e+08
90 °C, 2 h (4)	8	6.72155e+09	1.64324e+10	1.71853e+10	4.79457e+10	4.54105e+10	2.83371e+09	3.15627e+09	3.07372e+10	7.22413e+09	3.75817e+10	1.27244e+11	5.92151e+10	2.58225e+10	3.1903e+10	2.78984e+10	1.73081e+10	1.4856e+10	6.61758e+10	3.67106e+11	7.23555e+10	2.67583e+10	6.71228e+10	6.13903e+09	2.15073e+11	2.95657e+10	1.40257e+10	2.09334e+11	6.56953e+10	2.53568e+09	2.68015e+10	2.02996e+10	1.25081e+09	1.94661e+10	4.84338e+09	3.93323e+09	6.58013e+09	4.65339e+09	1.01947e+09	9.13461e+08	1.83848e+09	2.50742e+10	9.67338e+08
27 °C, 1 h (4)	2	6.5047e+09	1.8096e+10	1.95071e+10	4.60631e+10	4.25416e+10	2.64679e+09	2.88337e+09	2.93623e+10	7.00643e+09	3.47012e+10	1.12188e+11	5.93763e+10	2.80191e+10	3.45293e+10	3.03795e+10	1.61539e+10	1.47524e+10	6.7515e+10	3.14393e+11	6.12616e+10	2.08728e+10	5.71595e+10	5.40225e+09	2.10074e+11	3.21747e+10	1.27762e+10	1.32229e+11	5.24038e+10	3.37005e+09	5.8077e+10	3.89681e+10	9.65114e+08	1.73495e+10	3.57327e+09	3.62247e+09	5.82468e+09	1.09929e+09	4.29213e+08	1.2998e+08	4.4852e+08	2.17935e+10	6.14702e+07
90 °C, 2 min (5)	6	6.12659e+09	1.49724e+10	1.53197e+10	4.44336e+10	4.23481e+10	2.5709e+09	2.6691e+09	2.88108e+10	6.69922e+09	3.64744e+10	1.19695e+11	6.30007e+10	2.4873e+10	3.12827e+10	2.68811e+10	1.69906e+10	1.43627e+10	6.37103e+10	3.55281e+11	6.98037e+10	2.56549e+10	6.59363e+10	5.92722e+09	1.96497e+11	2.85836e+10	1.23779e+10	2.15685e+11	6.22897e+10	2.07746e+09	2.40506e+10	1.85143e+10	1.06352e+09	1.70144e+10	4.18053e+09	3.46824e+09	5.85536e+09	3.67039e+09	6.34457e+08	4.0487e+08	1.27243e+09	2.44754e+10	5.40053e+08
90 °C, 1 h (4)	7	6.58563e+09	1.57499e+10	1.6688e+10	4.42167e+10	4.2153e+10	2.74128e+09	2.72851e+09	2.84824e+10	6.89248e+09	3.69602e+10	1.14404e+11	5.46243e+10	2.51288e+10	3.1108e+10	2.71976e+10	1.68119e+10	1.43859e+10	6.28734e+10	3.26565e+11	6.57425e+10	2.56389e+10	6.20003e+10	6.04876e+09	2.02335e+11	2.98202e+10	1.28288e+10	2.15523e+11	6.17161e+10	2.44915e+09	2.48087e+10	1.90802e+10	1.15173e+09	1.59606e+10	4.59084e+09	3.75324e+09	6.29539e+09	4.42864e+09	1.01222e+09	7.45965e+08	1.44655e+09	2.28088e+10	6.36221e+08
27 °C, 2 h (4)	3	6.98604e+09	1.93445e+10	2.20203e+10	5.09797e+10	4.70384e+10	2.78677e+09	3.13017e+09	3.19251e+10	7.6041e+09	4.00267e+10	1.27483e+11	7.23763e+10	2.94462e+10	3.65079e+10	3.19943e+10	1.68469e+10	1.65134e+10	7.39882e+10	3.75348e+11	6.61919e+10	2.27985e+10	6.15996e+10	5.56001e+09	2.25147e+11	3.17796e+10	1.32278e+10	1.21536e+11	5.72227e+10	4.55803e+09	6.00422e+10	5.0703e+10	1.07947e+09	2.08085e+10	4.01027e+09	3.90232e+09	6.34125e+09	1.18804e+09	5.11546e+08	1.93372e+08	4.58559e+08	2.65024e+10	8.86848e+07
27 °C, 2 min (5)	1	6.02278e+09	1.58867e+10	1.62023e+10	4.28173e+10	3.94795e+10	2.53028e+09	2.59995e+09	2.74453e+10	6.32258e+09	3.42786e+10	1.07539e+11	5.31315e+10	2.50876e+10	3.03824e+10	2.70838e+10	1.50157e+10	1.28806e+10	6.06655e+10	3.10356e+11	5.18463e+10	1.50837e+10	4.84728e+10	4.82993e+09	1.72174e+11	2.87538e+10	1.22628e+10	1.50727e+11	4.18515e+10	2.43611e+09	4.08896e+10	2.7561e+10	7.91168e+08	1.66403e+10	2.86623e+09	3.44032e+09	5.25913e+09	1.07299e+09	2.39652e+08	4.47632e+07	2.65809e+08	2.07035e+10	3.72093e+07
Quality control (5)	9	1.05036e+11	2.09987e+10	2.62761e+10	5.31091e+10	4.96389e+10	1.13528e+10	3.7767e+09	2.8949e+10	1.19174e+10	2.77355e+11	1.22451e+11	1.72471e+11	2.94436e+10	3.45706e+10	3.06428e+10	1.60545e+10	1.9695e+10	7.04226e+10	3.64593e+11	5.56551e+10	2.14609e+10	5.10817e+10	5.99242e+09	2.06792e+11	3.01543e+10	1.43011e+10	1.33705e+11	4.87387e+10	3.77464e+09	4.19746e+10	3.096e+10	1.83932e+09	1.53195e+10	3.772e+09	4.22172e+09	6.98456e+09	1.66421e+09	5.83197e+08	3.37397e+08	6.55303e+08	2.01669e+10	2.3267e+08
90 °C, 1 h (5)	7	6.27608e+09	1.57893e+10	1.58576e+10	4.43476e+10	4.1901e+10	2.71812e+09	2.76879e+09	2.85219e+10	6.79411e+09	3.44413e+10	1.17412e+11	5.52548e+10	2.47836e+10	3.0629e+10	2.69364e+10	1.63243e+10	1.39502e+10	6.35833e+10	3.28572e+11	6.78589e+10	2.55062e+10	6.28268e+10	6.13598e+09	1.98455e+11	3.22101e+10	1.29986e+10	1.96024e+11	6.0472e+10	2.21195e+09	2.15604e+10	1.82997e+10	1.11573e+09	1.67863e+10	4.26408e+09	3.54183e+09	6.06385e+09	4.11035e+09	7.81377e+08	9.53837e+08	1.97195e+09	2.18979e+10	1.04363e+09
27 °C, 2 h (5)	3	6.93233e+09	1.87946e+10	2.14324e+10	4.81886e+10	4.46399e+10	2.7974e+09	3.0897e+09	3.0215e+10	7.5382e+09	3.82918e+10	1.19054e+11	6.67479e+10	2.89991e+10	3.52145e+10	3.13254e+10	1.63479e+10	1.55995e+10	7.06137e+10	3.42798e+11	6.47926e+10	2.17312e+10	5.94464e+10	5.66777e+09	2.18366e+11	3.1377e+10	1.31896e+10	1.23473e+11	5.50044e+10	4.11337e+09	5.81866e+10	4.69584e+10	1.04646e+09	1.9303e+10	3.74412e+09	3.74327e+09	6.1505e+09	1.08666e+09	4.97487e+08	1.19515e+08	4.64693e+08	2.41273e+10	8.00646e+07
90 °C, 2 h (5)	8	6.69174e+09	1.54446e+10	1.64248e+10	4.54883e+10	4.31855e+10	2.75587e+09	3.14885e+09	2.92997e+10	6.9618e+09	3.72602e+10	1.19226e+11	5.57277e+10	2.55532e+10	3.14473e+10	2.76276e+10	1.68786e+10	1.44712e+10	6.59427e+10	3.39507e+11	7.01722e+10	2.6382e+10	6.33786e+10	6.19412e+09	2.06863e+11	3.33772e+10	1.3444e+10	2.09842e+11	6.19935e+10	2.30415e+09	2.25599e+10	1.87692e+10	1.17227e+09	1.62714e+10	4.59852e+09	3.76524e+09	6.39824e+09	4.55678e+09	7.05769e+08	1.03049e+09	2.1669e+09	2.40982e+10	1.07097e+09
27 °C, 1 h (3)	2	6.63438e+09	1.73049e+10	1.87859e+10	4.06073e+10	3.78113e+10	2.7699e+09	2.87923e+09	2.61302e+10	6.77463e+09	3.30645e+10	1.00496e+11	4.7049e+10	2.74783e+10	3.29105e+10	2.9551e+10	1.525e+10	1.37876e+10	6.19934e+10	2.58176e+11	5.55111e+10	2.10683e+10	5.41333e+10	5.23364e+09	1.89527e+11	3.04997e+10	1.23814e+10	1.28685e+11	4.86967e+10	3.15705e+09	4.82316e+10	3.49958e+10	9.51788e+08	1.36308e+10	3.31809e+09	3.62084e+09	5.70286e+09	1.04456e+09	4.38713e+08	1.91169e+08	4.46544e+08	1.77944e+10	1.13838e+08
Quality control (6)	9	1.06398e+11	2.08242e+10	2.60683e+10	5.28242e+10	4.92092e+10	1.10274e+10	3.77853e+09	2.88269e+10	1.14914e+10	2.6753e+11	1.23586e+11	1.67086e+11	2.94763e+10	3.48529e+10	3.063e+10	1.59162e+10	1.96991e+10	7.06207e+10	3.58412e+11	5.62864e+10	2.12566e+10	5.08725e+10	6.11516e+09	2.04639e+11	3.01469e+10	1.41418e+10	1.29789e+11	4.78919e+10	3.87197e+09	4.26218e+10	3.0834e+10	1.81231e+09	1.48133e+10	3.85158e+09	4.21981e+09	6.93363e+09	1.63956e+09	5.92628e+08	3.31362e+08	6.66294e+08	1.96737e+10	2.13293e+08
27 °C, 1 h (2)	2	6.31314e+09	1.76761e+10	1.83293e+10	4.67724e+10	4.30572e+10	2.5754e+09	2.76829e+09	3.02075e+10	6.88847e+09	3.52408e+10	1.24888e+11	6.25447e+10	2.77411e+10	3.38875e+10	3.05773e+10	1.5458e+10	1.417e+10	6.83696e+10	3.53825e+11	6.3734e+10	2.12628e+10	5.93871e+10	5.45425e+09	2.04239e+11	3.16299e+10	1.284e+10	1.42184e+11	5.4122e+10	3.33346e+09	5.02652e+10	3.6635e+10	9.20815e+08	1.59457e+10	3.20212e+09	3.22856e+09	5.23282e+09	9.64783e+08	4.60661e+08	1.1596e+08	4.12535e+08	2.28722e+10	6.94816e+07
