# Supplementary material for: Metabolomic analysis of bioactive compounds in dill (Anethum graveolens L.) extracts
Source: PeerJ. 2025 Jun 10;13:e19567. doi: 10.7717/peerj.19567 (PMC12164813; doi:10.7717/peerj.19567)
Supplement: Supplemental Information 8 [file peerj-13-19567-s008.xlsx]

## Sheet: Sheet1
	Raw data of antioxidant activities, related to Figure 4 and 5
	TPC (µg GAE/mg DW)						FRAP (µg GAE/mg DW)						ABTS (µg TE/mg DW)						ORAC (µg TE/mg DW)
	Hot water (90 °C)			Room temperature water (27 °C )			Hot water (90 °C)			Room temperature water (27 °C)			Hot water (90 °C)			Room temperature water (27 °C )			Hot water (90 °C)			Room temperature water (27 °C )
	2 min	1 h	2 h	2 min	1 h	2 h	2 min	1 h	2 h	2 min	1 h	2 h	2 min	1 h	2 h	2 min	1 h	2 h	2 min	1 h	2 h	2 min	1 h	2 h
1	26.34	28.17	29.82	26.19	25.44	23.74	14.22	14.92	15.29	12.87	11.56	12.03	30.22	29.83	29.76	22.9	24.19	19.77	24.94	25.46	24.39	19.25	18.17	19.84
2	26.92	29.01	30.7	28.07	23.37	22.7	14.48	14.56	14.69	13.51	12.01	11.58	29.13	28.49	27.84	24.38	25.02	19.06	24.53	24.64	24.57	19.53	19.97	19.49
3	27.47	29.63	30.33	26.7	23.56	24.26	13.71	14.61	15.07	12.94	12.33	12.18	25.03	29.19	28.55	19.57	20.53	19.32	23.74	25.26	24.76	18.84	20.38	20.04
4	28.43	28.54	29.52	27.59	24.22	24.52	14.29	14.19	15.1	12.74	11.46	11.52	27.97	28.49	27.33	20.28	25.85	22.72	25.02	25.43	23.05	19.71	19.7	19.52
5	28.97	26.56	27.99	26.96	23.56	23.04	15.08	13.04	14.86	12.14	12.42	11.22	31.24	32.91	25.53	22.07	23.8	18.74	23.52	25.61	23.77	18.72	17.4	18.43
6	24.52	25.63	25.77	26.74	23.62	22.25	13.66	14.86	15.88	11.98	12.14	11.23	32.42	32.75	27.39	24.12	25.21	19.89	23.89	24.79	23.28	21.17	19.52	21.47
7	26.67	27.38	26.85	28.95	22.61	23.15	15.69	15.25	15.45	12.86	13.21	11.6	29.15	28.22	24.89	22.71	25.01	23.42	23.82	23.56	23.92	21.82	21.67	22.27
8	26.81	27.67	27.24	28.19	23.73	24.96	13.91	14.61	15.46	12.49	12.74	13.05	25.15	30.89	24.56	20.97	19.69	22.49	24.63	24.25	24.13	19.91	21.31	21.76
9	25.81	25.34	24.12	25.91	23.3	23.88	14.74	15.16	14.26	13.06	12.62	12.4	27.75	28.29	24.89	19.69	24.63	22.75	23.43	22.74	24.05	22.64	22.2	22.2
10	28.35	23.26	25.84	27.39	22.94	22.94	15.57	13	14.8	12.84	13	12.06	27.02	31.09	23.8	20.53	22.83	17.29	22.56	24.56	23.89	20.22	21.52	23.37
11	24.89	25.44	25.44	26.41	24.36	22.97	13.95	16.24	16.24	12.62	11.91	12.6	32.65	38.11	28.69	22.21	24.35	15.38	25.34	27.39	27.92	22.86	23.13	22.47
12	26.7	25.4	25.8	28.65	24.21	23.15	16.51	15.54	16.05	12.81	13.24	11.91	26.36	25.91	26.37	25.42	24.6	21.21	25.7	26.5	25.31	22.02	24.01	21.14
13	27.03	26.2	27.28	26.45	23.37	24.1	14.43	15.57	15.56	13.24	13.62	14.64	19.62	27.27	29.13	18.06	22.97	17.73	26.41	26.13	25.14	23.03	22.39	21.36
14	29.06	26.85	23.84	27.99	23.88	24.25	15.93	15.63	14.41	14.66	13.55	12.75	20.46	24.02	27.94	20.08	26.62	23.94	26.76	24.78	26.01	22.45	22.87	22.72
15	29.46	24.13	25.07	27.51	23.63	24.1	16.82	13.74	15.41	13.29	13.08	12.45	22.65	29.39	27.37	19.26	24.6	19.17	26.29	26.07	24.88	23.13	22.21	21.62
Average	27.162	26.614	27.0407	27.3133	23.72	23.6007	14.866	14.728	15.2353	12.9367	12.5927	12.2147	27.1213	29.6567	26.936	21.4833	23.9933	20.192	24.7053	25.1447	24.6047	21.02	21.0967	21.18
SD	1.47762	1.80797	2.21895	0.926118	0.66628	0.771626	1.01844	0.931145	0.575076	0.624199	0.689539	0.865158	3.99963	3.31303	1.83214	2.12725	1.85498	2.49028	1.2316	1.16697	1.20352	1.62993	1.86892	1.41365
