# Supplementary material for: Metabolomic analysis of bioactive compounds in dill (Anethum graveolens L.) extracts
Source: PeerJ. 2025 Jun 10;13:e19567. doi: 10.7717/peerj.19567 (PMC12164813; doi:10.7717/peerj.19567)
Supplement: Supplemental Information 9 [file peerj-13-19567-s009.xlsx]

## Sheet: Sheet1
	Raw data of percentage of cytosolic oxidation, related to Figure 6
	1st	Basal	10 mM H2O2	27 °C, 2 min	90 °C, 2 min	Gallic acid
	1	16201	20791	15717	14234	8375
	2	15398	20573	15552	14634	9760
	3	16868	20901	16368	14265	9828
	Average	16155.7	20755	15879	14377.7	9321
	SD	736.048	166.937	431.448	222.532	819.965
	%ROS	100	128.469	98.2875	88.9946	57.6949
	2nd	Basal	10 mM H2O2	27 °, 2 min	90 °C, 2 min	Gallic acid
	1	14051	20122	14068	14740	7392
	2	13759	20572	13016	14621	7333
	3	14387	20517	13982	14261	7172
	Average	14065.7	20403.7	13688.7	14540.7	7299
	SD	314.257	245.476	584.131	249.4	113.873
	%ROS	100	145.06	97.3197	103.377	51.8923
	3rd	Basal	10 mM H2O2	27 °C, 2 min	90 °C, 2 min	Gallic acid
	1	10859	17112	9976	9887	7517
	2	11434	15599	11022	9857	7494
	3	11948	17914	10918	11293	8969
	Average	11413.7	16875	10638.7	10345.7	7993.33
	SD	544.785	1175.56	576.237	820.552	845.03
	%ROS	100	147.849	93.2099	90.6428	70.033
