# Supplementary material for: Metabolomic analysis of bioactive compounds in dill (Anethum graveolens L.) extracts
Source: PeerJ. 2025 Jun 10;13:e19567. doi: 10.7717/peerj.19567 (PMC12164813; doi:10.7717/peerj.19567)
Supplement: Supplemental Information 11 [file peerj-13-19567-s011.xlsx]

## Sheet: Sheet1
	The band signal intensity ratio of mTOR, Akt, AMPK, FOXO3, SIRT6, and β-actin, related to Figure 7
			mTOR
		1	2	3
	Control	2370	1232	2755
	27 °C, 2 min	1587	812	992
	90 °C, 2 min	1449	952	1072
			Akt
		1	2	3
	Control	1826	2352	1672
	27 °C, 2 min	1080	1380	924
	90 °C, 2 min	936	1596	980
			AMPK
		1	2	3
	Control	1501	1310	1290
	27 °C, 2 min	1005	804	990
	90 °C, 2 min	1008	770	975
			FOXO3
		1	2	3
	Control	1701	1001	1185
	27 °C, 2 min	2548	1328	1782
	90 °C, 2 min	2587	1580	1694
			SIRT6
		1	2	3
	Control	1386	1620	1680
	27 °C, 2 min	2112	2324	2112
	90 °C, 2 min	2072	2100	1975
			β-actin
		1	2	3
	Control	2821	3168	2975
	27 °C, 2 min	2728	2975	2772
	90 °C, 2 min	2970	3220	3132
